# Supplementary material for: MicroRNA-144 suppresses osteosarcoma growth and metastasis by targeting ROCK1 and ROCK2
Source: PubMed Central journal article supplement (PMC4496356; doi:10.18632/oncotarget.3305), 2015-04-13
Supplement: oncotarget-06-10297-s001.pdf [file oncotarget-06-10297-s001.pdf]

## SUPPLEMENTARY FIGURES AND TABLES

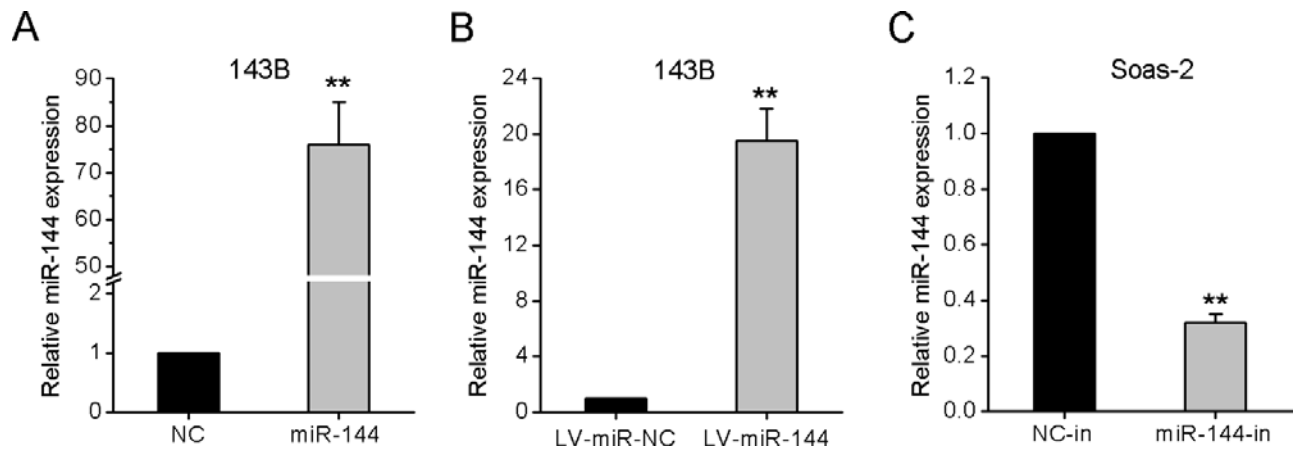

**Supplementary Figure S1: Modification of miR-144 levels in the OS cell lines 143B and Soas-2.** **A.** Relative expression of miR-144 in 143B cells transfected by miR-144 mimics (100 nM) or NC mimics. **B.** Relative expression of miR-144 in 143B cells stably infected with lentivirus expressing miR-144 or NC. **C.** Relative expression of miR-144 in Soas-2 cells transfected by miR-144 inhibitor or NC inhibitor. \*\* $P < 0.01$ .

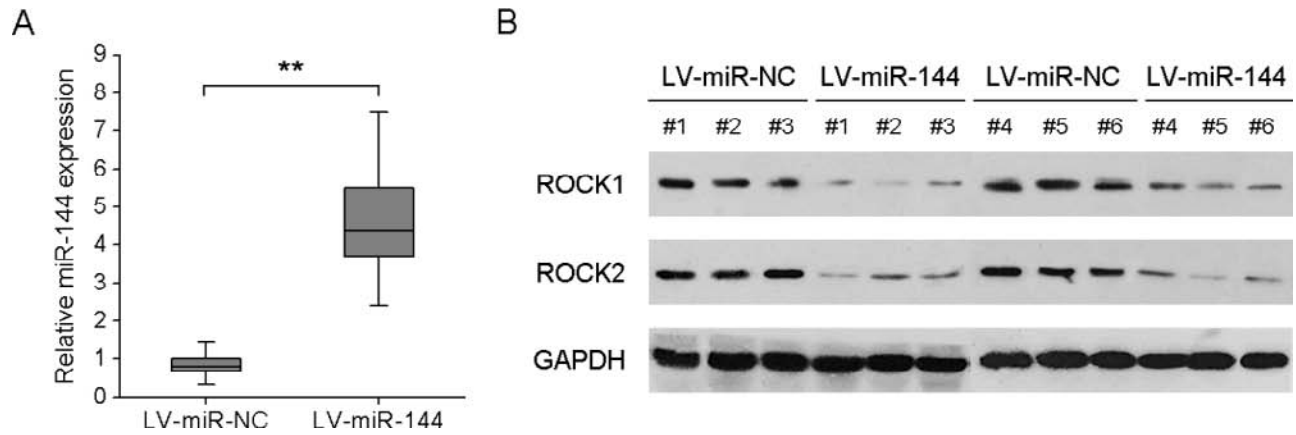

**Supplementary Figure S2: miR-144 inhibited expression of ROCK1 and ROCK2 in xenograft tumor tissues.**  
**A.** Expression of miR-144 in isolated tumors was analyzed by qRT-PCR. **B.** Western blot analysis of ROCK1 and ROCK2 protein levels in isolated tumors. **\*\*** $P < 0.01$ .

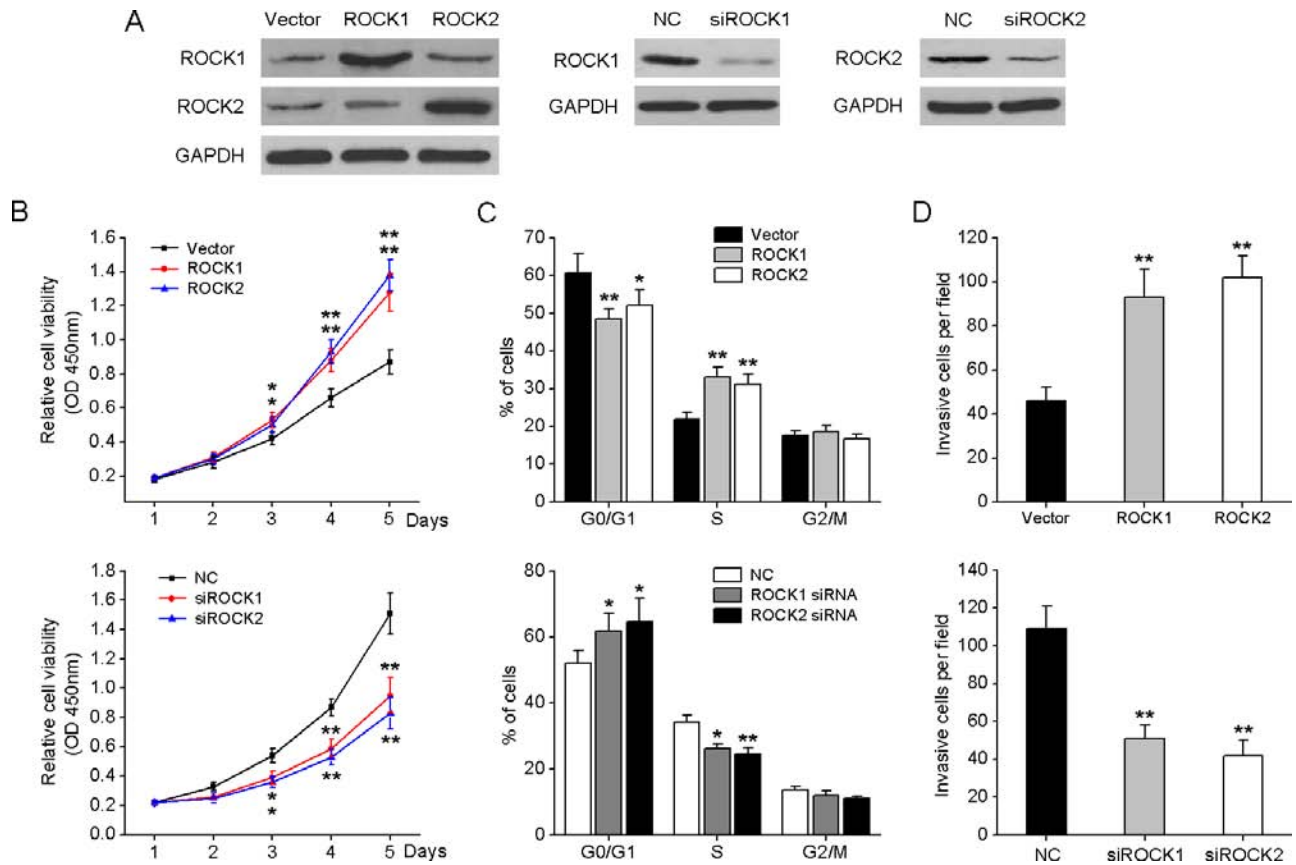

**Supplementary Figure S3: Downregulation of *ROCK1* and *ROCK2* mediates miR-144's function in OS cells.** 143B-miR-144 cells were transfected with empty pcDNA3.1 vector, *ROCK1*- or *ROCK2*-containing plasmid (left); 143B cells were transfected with siRNA against *ROCK1* or *ROCK2* (right). Western blot analysis of *ROCK1* and *ROCK2* expression is shown in **A**. Cell viability **B**, cell cycle distribution **C**, and cell invasion **D**, were measured with the CCK-8 assay, flow cytometry and transwell invasion assay, respectively. \* $P < 0.05$ , \*\* $P < 0.01$ .

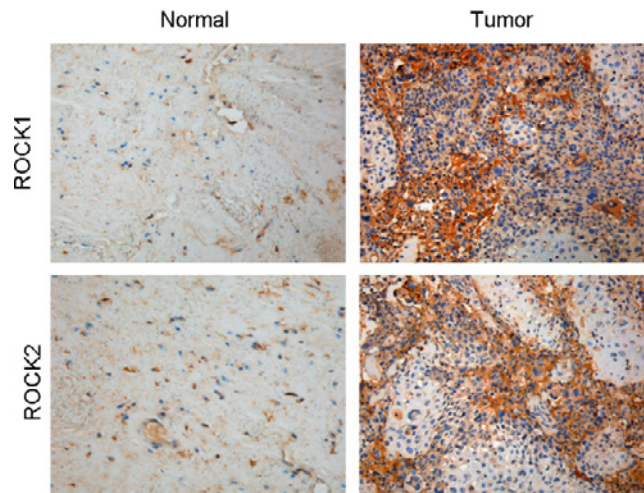

**Supplementary Figure S4: Immunohistochemistry (IHC) analysis of ROCK1 and ROCK2 protein expression in OS.** Representative images from IHC assays of 24 paired OS and adjacent normal bone tissues.

**Supplementary Table S1. Summary of clinicopathologic variables**

| Clinical pathologic parameters | Number of Patients |
|--------------------------------|--------------------|
| <b>Gender</b>                  |                    |
| Male                           | 39                 |
| Female                         | 28                 |
| <b>Age (yrs)</b>               |                    |
| < 18                           | 31                 |
| ≥ 18                           | 36                 |
| <b>Location</b>                |                    |
| Femur                          | 43                 |
| Tibia                          | 17                 |
| Other                          | 7                  |
| <b>Tumor size (cm)</b>         |                    |
| < 8                            | 30                 |
| ≥ 8                            | 37                 |
| <b>Enneking stage</b>          |                    |
| I                              | 9                  |
| II                             | 45                 |
| III                            | 13                 |
| <b>Histologic grade</b>        |                    |
| Low grade                      | 9                  |
| High grade                     | 58                 |
| <b>Metastasis</b>              |                    |
| Present                        | 13                 |
| Absent                         | 54                 |

**Supplementary Table S2. Primers used for qRT-PCR**

| Primers        | Nucleotide sequence |                                                              |
|----------------|---------------------|--------------------------------------------------------------|
| miR-144        | RT-Oligo            | 5'-GTCGTATCCAGTGCAGGGTCCGAGGTATTTCGCACTGGAT ACGACAGTACA-3'   |
|                | Sense               | 5'- TACAGTATAGATGA -3'                                       |
|                | Antisense           | 5'- GTGCAGGGTCCGAGGT -3'                                     |
| U6 snRNA       | RT-Oligo            | 5'-GTCGTATCCAGTGCAGGGTCCGAGGTATTTCGCACTGGATACGACAAAATATG -3' |
|                | Sense               | 5'- GCGCGTCGTGAAGCGTTC -3'                                   |
|                | Antisense           | 5'- GTGCAGGGTCCGAGGT -3'                                     |
| ROCK1          | Sense               | 5'- AAAAAATGGACAACCTGCTGC -3'                                |
|                | Antisense           | 5'- GGCAGGAAAATCCAAATCAT-3'                                  |
| ROCK2          | Sense               | 5'- CGCTGATCCGAGACCCT -3'                                    |
|                | Antisense           | 5'- TTGTTTTTCCTCAAAGCAGGA-3'                                 |
| $\beta$ -actin | Sense               | 5'- GCATCCTCACCCCTGAAGTAC -3'                                |
|                | Antisense           | 5'- GGCTGGGGTGTTGAAGGTCT -3'                                 |

**Supplementary Table S3. Relationship between miR-144 expression and clinicopathologic features of OS patients**

| Clinical pathologic parameters | miR-144 expression |     | P-Value      |
|--------------------------------|--------------------|-----|--------------|
|                                | High               | Low |              |
| <b>Gender</b>                  |                    |     |              |
| Male                           | 21                 | 18  | 0.624        |
| Female                         | 13                 | 15  |              |
| <b>Age (yrs)</b>               |                    |     |              |
| <18                            | 14                 | 17  | 0.466        |
| ≥18                            | 20                 | 16  |              |
| <b>Location</b>                |                    |     |              |
| Femur                          | 23                 | 20  | 0.648        |
| Tibia                          | 7                  | 10  |              |
| Other                          | 4                  | 3   |              |
| <b>Tumor size (cm)</b>         |                    |     |              |
| <8                             | 19                 | 11  | 0.087        |
| ≥8                             | 15                 | 22  |              |
| <b>Enneking stage</b>          |                    |     |              |
| I                              | 3                  | 6   | 0.091        |
| II                             | 27                 | 18  |              |
| III                            | 4                  | 9   |              |
| <b>Histologic grade</b>        |                    |     |              |
| Low grade                      | 3                  | 6   | 0.305        |
| High grade                     | 31                 | 27  |              |
| <b>Metastasis</b>              |                    |     |              |
| Present                        | 3                  | 10  | <b>0.033</b> |
| Absent                         | 31                 | 23  |              |
